# Supplementary material
Source: Springer Nature journal article supplement (https://www.springermedizin.de/resource/supplementary/12985_2011_1371_MOESM8_ESM.pdf/9609660)

Anti-LC3

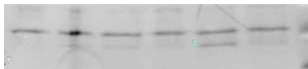

LC3-I  
LC3-II

Anti-FLAG

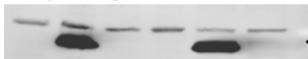

NS1

Anti- $\beta$ -actin

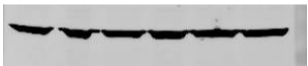

24h pi

48h pi

Mock

NS1F

NS1F-ELCmut

Mock

NS1F

NS1F-ELCmut

Supplement: MOESM8 [file 9609660]
